# Supplementary material for: Atomically thin layers of MoS2via a two step thermal evaporation–exfoliation method
Source: Royal Society of Chemistry journal article supplement (doi:10.1039/c1nr10803d), 2011-11-07

# Atomically of MoS<sub>2</sub> thin layers via a two step thermal evaporation - exfoliation method

Sivacarendran Balendhran<sup>a\*</sup>, Jian Zhen Ou<sup>a</sup>, Madhu Bhaskaran<sup>a</sup>, Sharath Sriram<sup>a</sup>, Samuel Ippolito<sup>b</sup>, Zoran Vasic<sup>c</sup>, Eugene Kats<sup>d</sup>, Suresh Bhargava<sup>b</sup>, Serge Zhuiykov<sup>d</sup> and Kourosh Kalantar-zadeh<sup>a\*</sup>

## Electronic Supplementary Information

<sup>a</sup>School of Electrical and Computer Engineering, RMIT University, Melbourne, VIC, Australia; E-mail: [shiva.balendhran@rmit.edu.au](mailto:shiva.balendhran@rmit.edu.au) and [kourosh.kalantar@rmit.edu.au](mailto:kourosh.kalantar@rmit.edu.au)

<sup>b</sup>School of Applied Sciences, RMIT University, Melbourne, VIC, Australia

<sup>c</sup>Melbourne Centre for Nano Fabrication, Clayton, VIC, Australia

<sup>d</sup>Materials Science and Engineering Division, CSIRO, Highett, VIC, Australia

### ESI.1 AFM Images

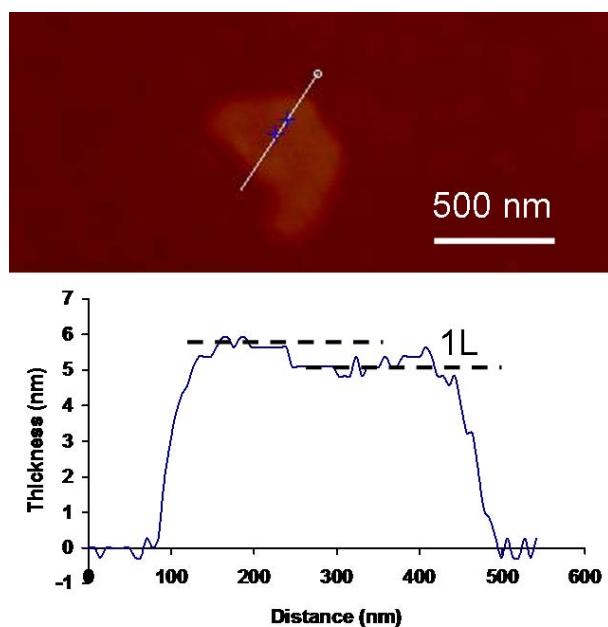

Fig. S1 A flake made of 8 layers. A one layer step on the top of the 8th layer can be resolved.

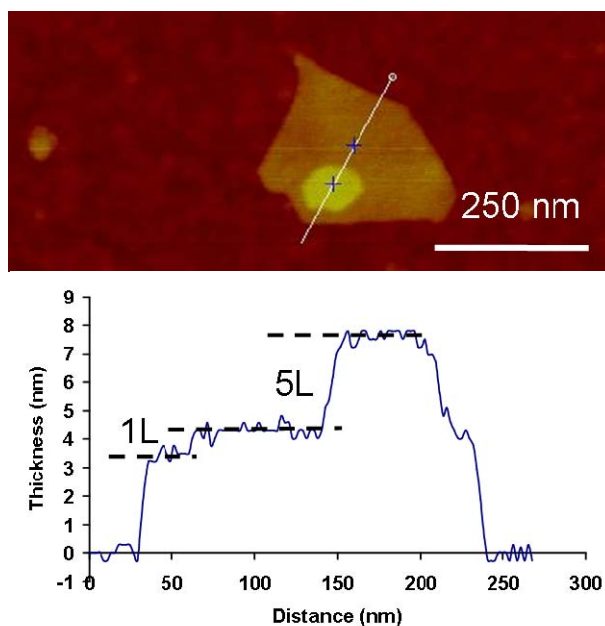

**Fig. S2** A flake made of 6 layers. A single step and a 5 layer sheet on the top of this can also be observed

## ESI.2 Proposed Reaction Mechanisms

At the lower temperatures of 775 °C, MoO<sub>3</sub> has been reduced to MoO<sub>2</sub> as the evaporated sulphur interacts with oxygen atoms of MoO<sub>3</sub> to produce SO<sub>2</sub>, which is extracted as a gaseous by-product. At the higher temperature of 830 °C a mixture of MoS<sub>2</sub> and MoO<sub>3</sub> is obtained as the sulphur replaces the oxygen in MoO<sub>2</sub>. This leads to the decrease in the percentage of gaseous sulphur which makes the annealing atmosphere less of a reduction environment. The replaced oxygen ions at higher temperatures along with the lack of sulphur allow a fraction of MoO<sub>2</sub> to re-oxidize back to MoO<sub>3</sub>. Similar interactions have been reported by Ressler et al.<sup>30</sup> in a study of the formation of sub Mo oxides from MoO<sub>3</sub> in a reducing (H<sub>2</sub>) environment. The proposed reaction mechanisms at 830 °C provide an overview of the composition of the end-product in relation to the initial ratio of reactants.

Proposed reaction mechanism at 775 °C:

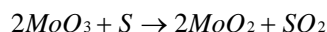

Proposed reaction mechanism at 830 °C:

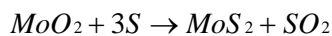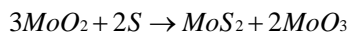

Supplement: c1nr10803d.pdf [file c1nr10803d.pdf]
